# Supplementary material
Source: PubMed Central journal article supplement (PMC4380195)
Supplement: np5007718_si_001.pdf [file np5007718_si_001.pdf]

# Hypocoprins A-C: New Sesquiterpenoids from the Coprophilous

## Fungus *Hypocopra rostrata* (Xylariales)

Dinith R. Jayanetti,<sup>†</sup> Qun Yue,<sup>‡</sup> Gerald F. Bills,<sup>‡</sup> and James B. Gloer<sup>\*,†</sup>

<sup>†</sup>Department of Chemistry, University of Iowa, Iowa City, IA 52242

<sup>‡</sup>Texas Therapeutics Institute, The Brown Foundation Institute of Molecular Medicine,

University of Texas Health Science Center at Houston, 1881 East Road, Houston, TX, 77054

### List of Supporting Information

**Figure S1.** *Hypocopra rostrata* TTI-0009. A. Ascomata and mycelia pseudostroma on horse dung (Bar = 2 mm). B. Ascomata and mycelia pseudostroma on horse dung (Bar = 1 mm). C. Conidiomata on horse dung (Bar = 5 mm). D. Conidia and conidiogenous cells (Bar = 10  $\mu$ m). E. Ascospores (bar = 20  $\mu$ m). F. Ascomata and conidiomata on malt yeast extract agar (Bar = 1 cm).

**Figure S2.** Consensus neighbor-joining analysis of the ITS rDNA region selected fungi of the Xylariaceae. Numbers at branch points indicate bootstrap support percentages. *Hypocopra rostrata* TTI-0009 is indicated in red. *Daldinia* species were designated as the outgroup.

**Figure S3.** <sup>1</sup>H NMR Spectrum of Hypocoprin A (**1**, 400 MHz, CDCl<sub>3</sub>)

**Figure S4.** <sup>1</sup>H NMR Spectrum of Hypocoprin A (**1**, 400 MHz, Acetone-*d*<sub>6</sub>)

**Figure S5.** <sup>13</sup>C NMR Spectrum of Hypocoprin A (**1**, 100 MHz, Acetone-*d*<sub>6</sub>)

**Figure S6.** COSY Spectrum of Hypocoprin A (**1**, 600 MHz, Acetone-*d*<sub>6</sub>)

**Figure S7.** HSQC Spectrum of Hypocoprin A (**1**, 600 MHz, Acetone-*d*<sub>6</sub>)

**Figure S8.** HMBC Spectrum of Hypocoprin A (**1**, 600 MHz, Acetone-*d*<sub>6</sub>)

**Figure S9.** COSY Spectrum of Hypocoprin A (**1**, 600 MHz, Acetone-*d*<sub>6</sub>)

**Figure S10.**  $^1\text{H}$  NMR Spectrum of Hypocoprin B (**2**, 400 MHz,  $\text{CDCl}_3$ )

**Figure S11.**  $^1\text{H}$  NMR Spectrum of Hypocoprin C (**3**, 400 MHz, Acetone- $d_6$ )

**Figure S12.**  $^{13}\text{C}$  NMR Spectrum of Hypocoprin C (**3**, 100 MHz, Acetone- $d_6$ )

**Figure S13.** Observed chemical shift differences ( $\Delta\delta = \delta_S - \delta_R$ , ppm; 400 MHz) for the *R*- and *S*-MTPA esters of **1**. Only H's affording notable  $\Delta\delta$  values are labelled.



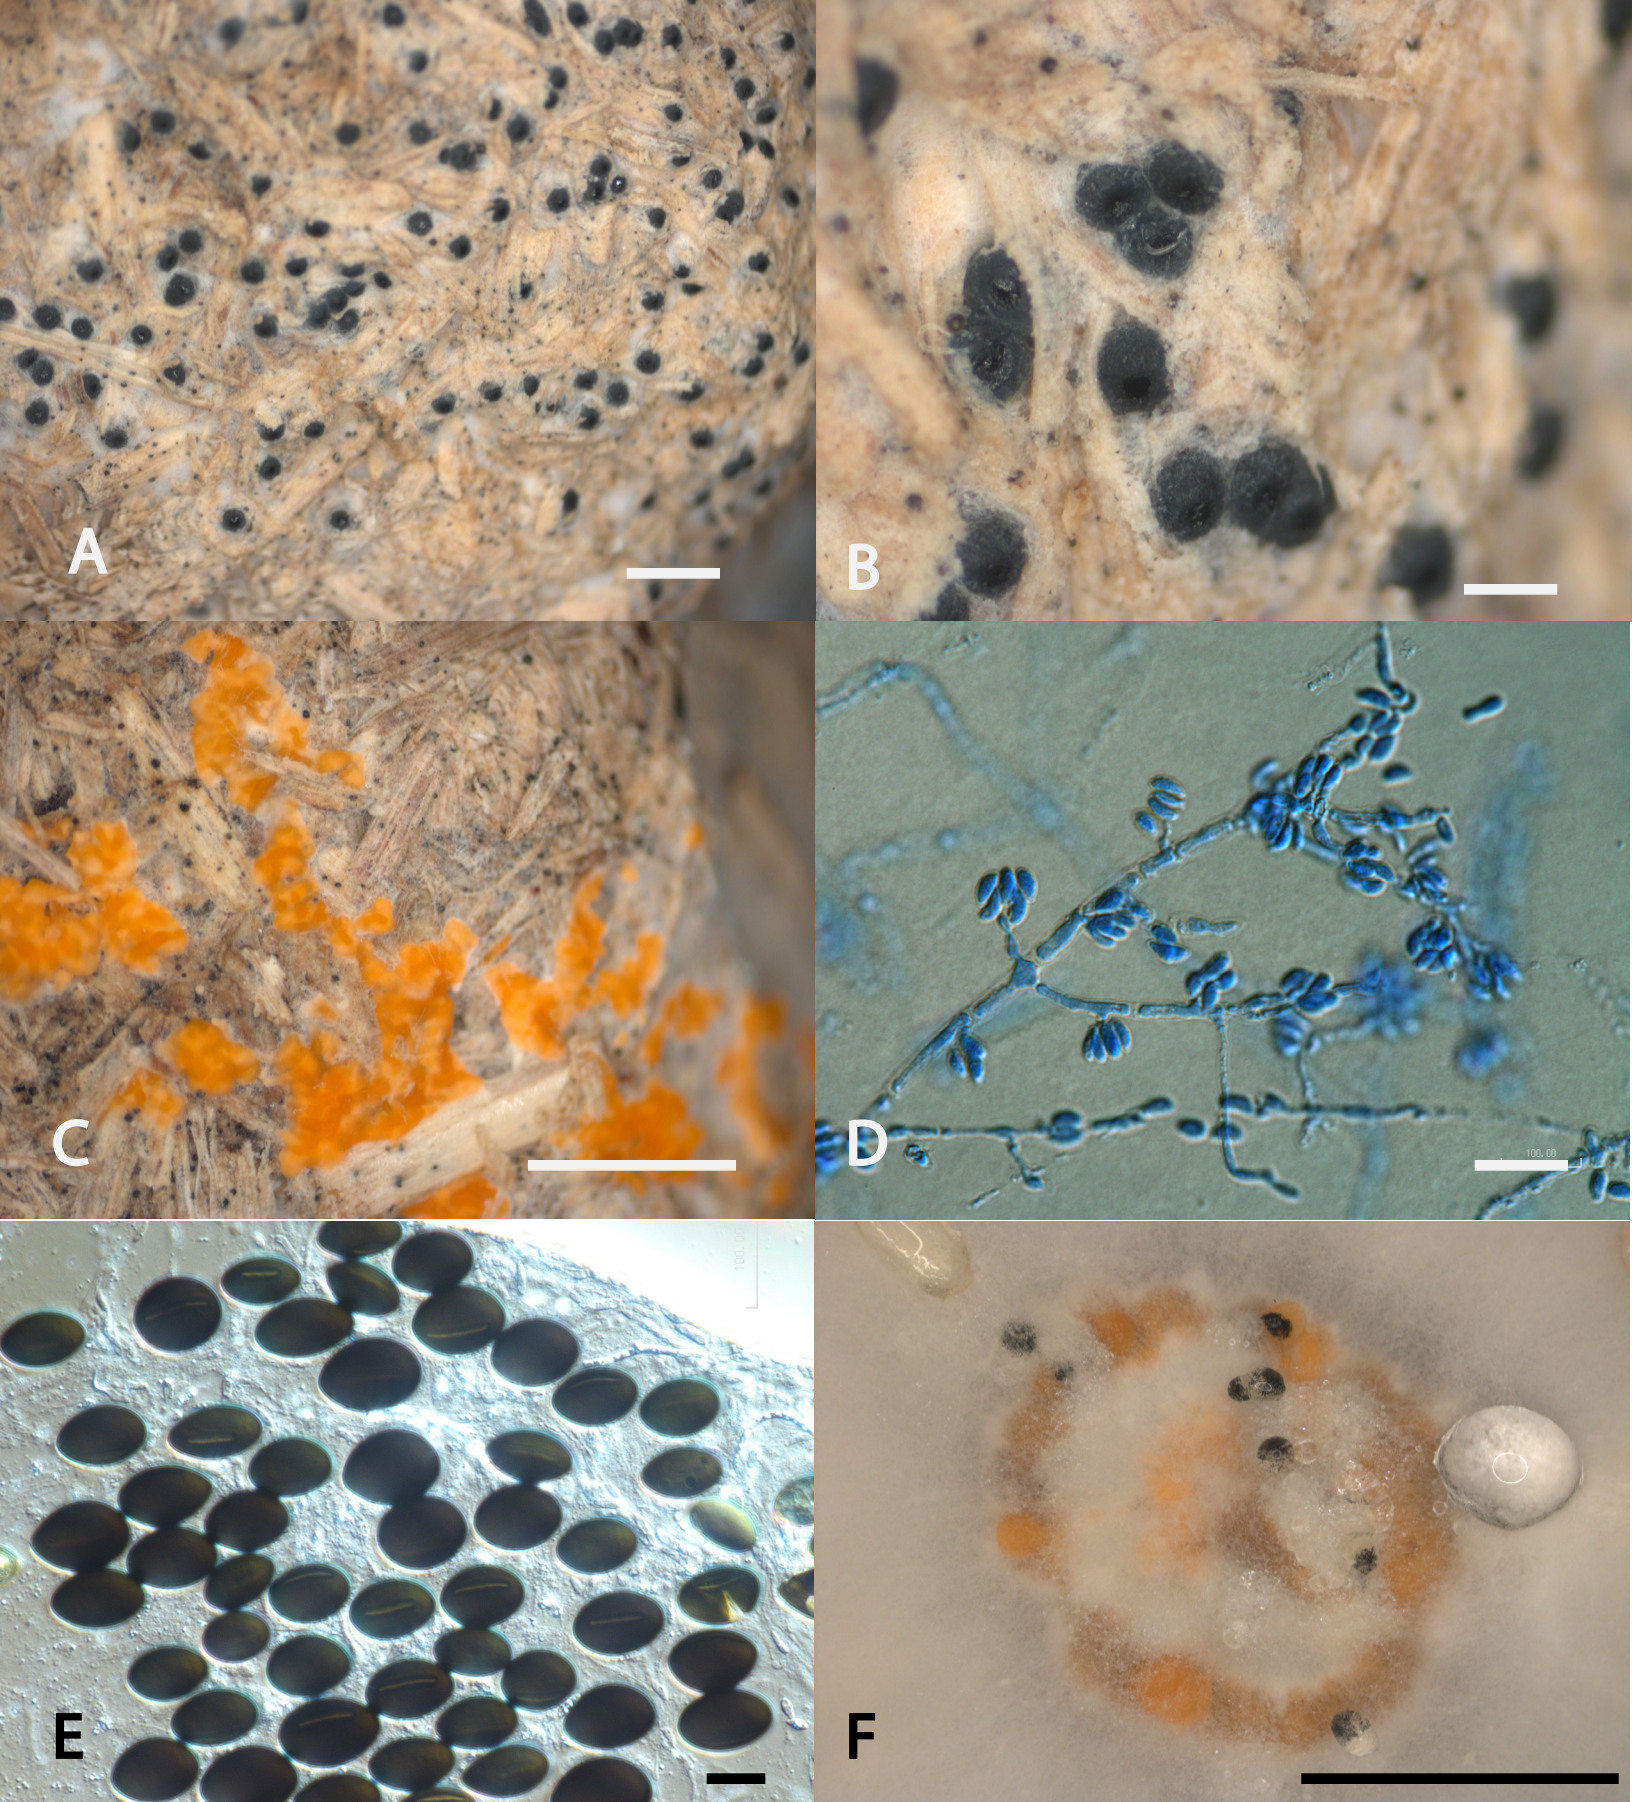

Figure S1. *Hypocopa rostrata* TTI-0009. A. Ascomata and mycelia pseudostroma on horse dung (Bar = 2 mm). B. Ascomata and mycelia pseudostroma on horse dung (Bar = 1 mm). C. Conidiomata on horse dung (Bar = 5 mm). D. Conidia and conidiogenous cells (Bar = 10  $\mu$ m). E. Ascospores (bar = 20  $\mu$ m). F. Ascomata and conidiomata on malt yeast extract agar (Bar = 1 cm)



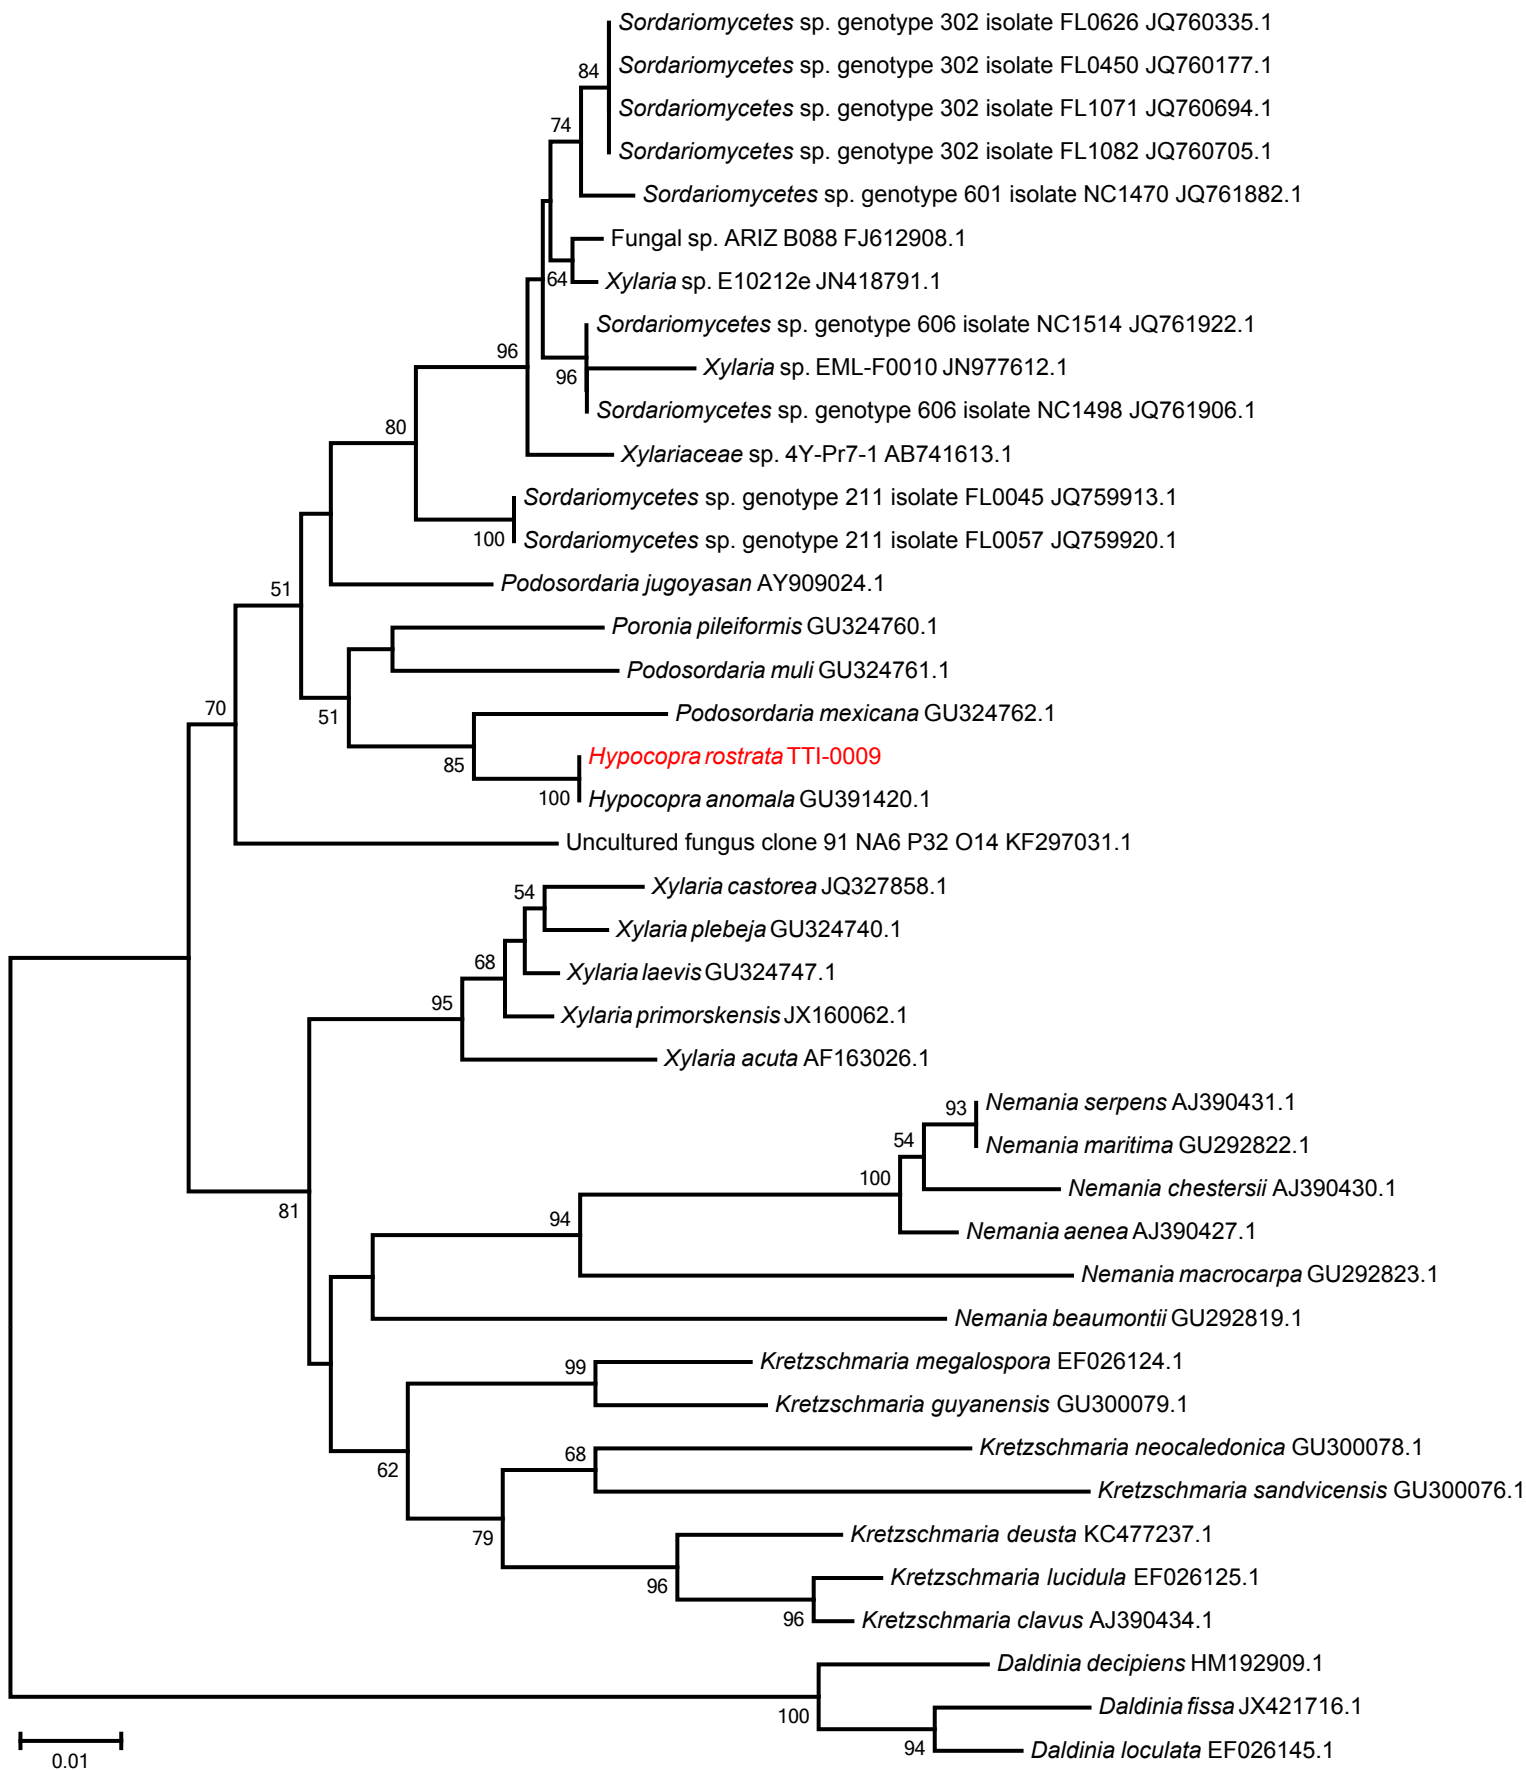

Figure S2. Consensus neighbor-joining analysis of the ITS rDNA region selected fungi of the Xylariaceae. Numbers at branch points indicate bootstrap support percentages. *Hypocopa rostrata* TTI-0009 is indicated in red. *Daldinia* species were designated as the outgroup.

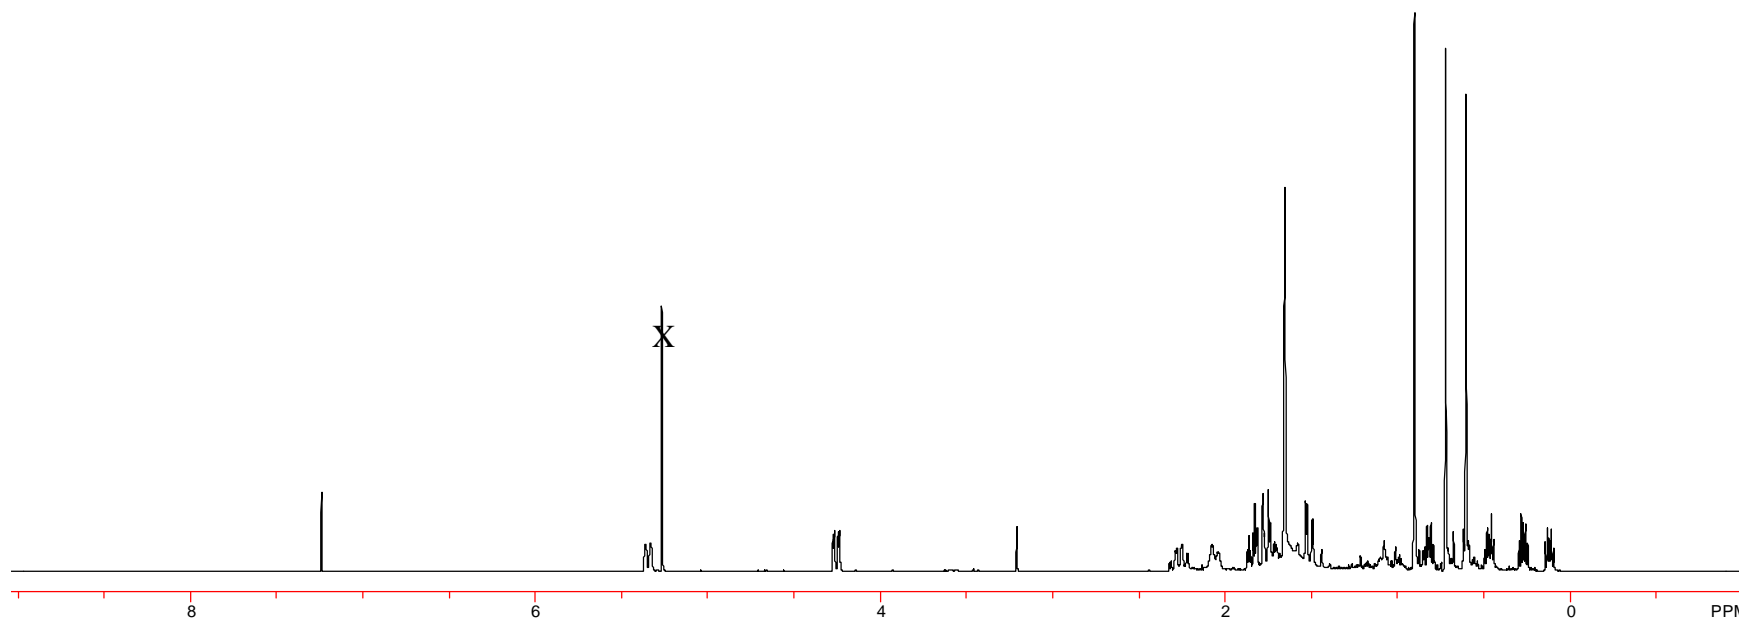

**Figure S3.**  $^1\text{H}$  NMR Spectrum of Hypocoprin A (1, 400 MHz,  $\text{CDCl}_3$ )

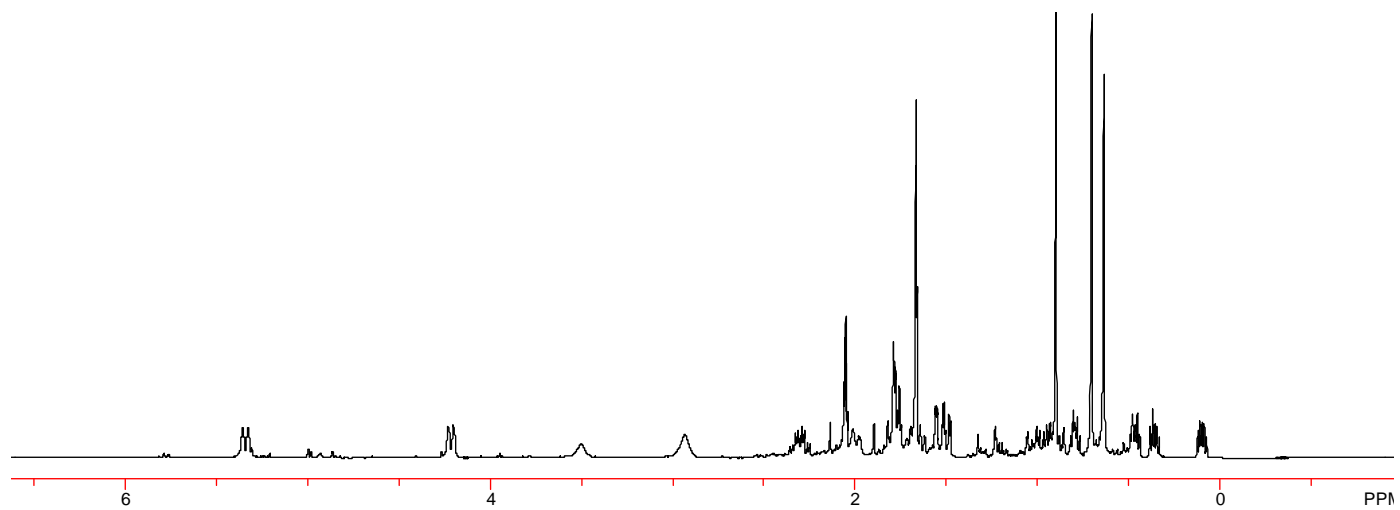

**Figure S4.**  $^1\text{H}$  NMR Spectrum of Hypocoprins A (**1**, 400 MHz,  $\text{Acetone-}d_6$ )

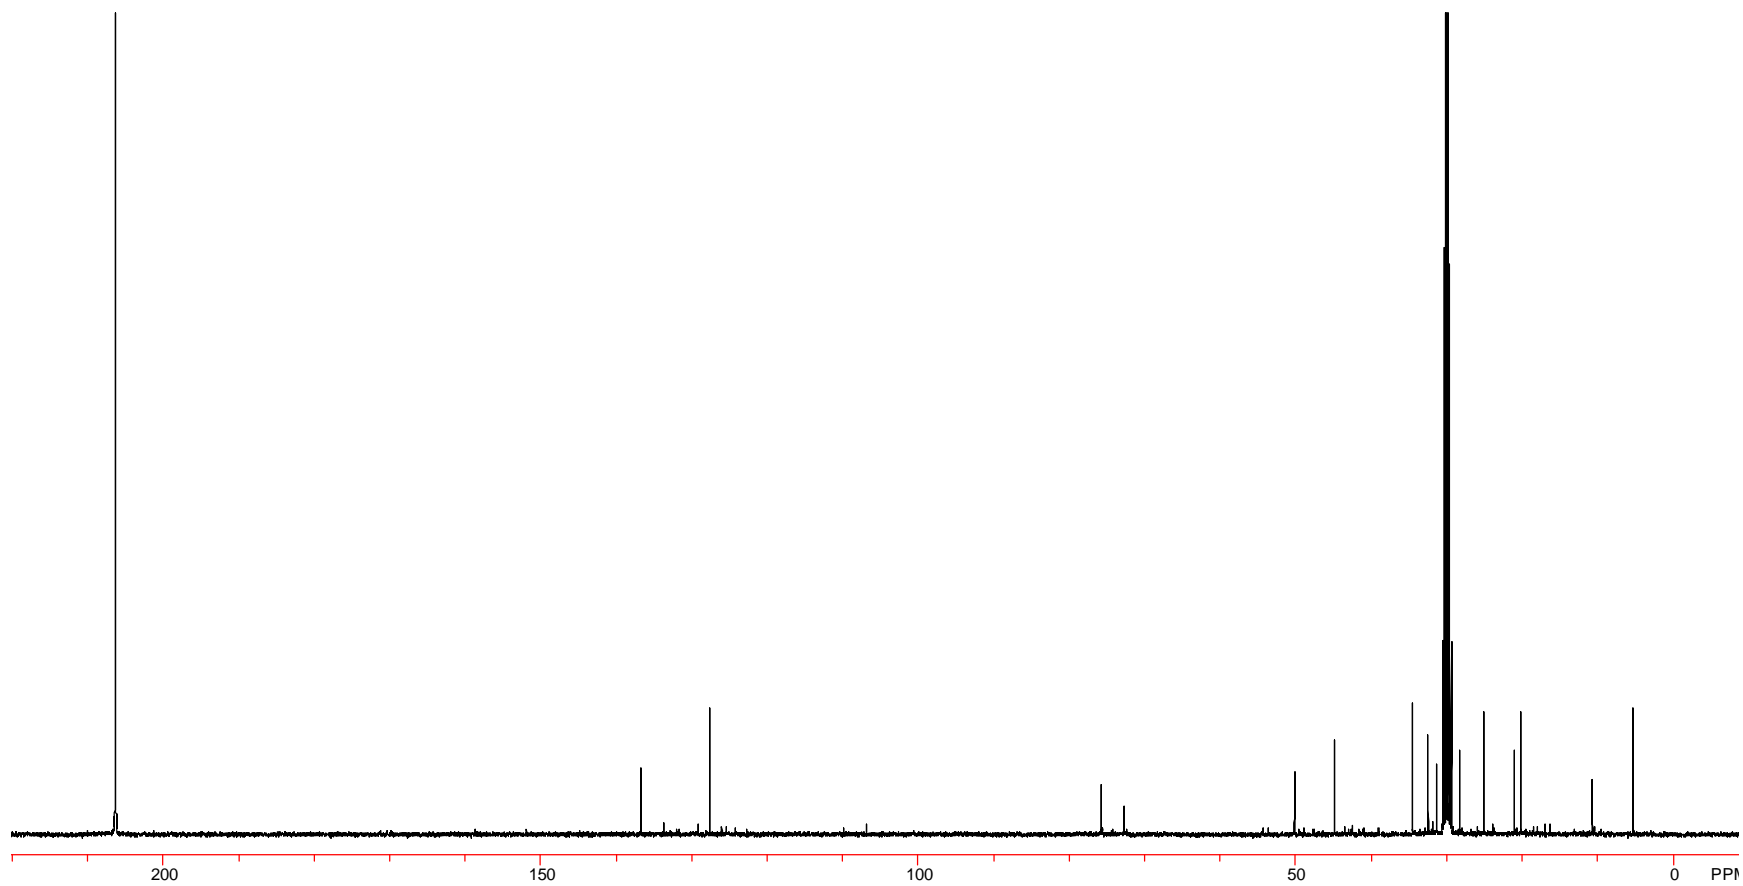

**Figure S5.**  $^{13}\text{C}$  NMR Spectrum of Hypocoprin A (**1**, 100 MHz, Acetone- $d_6$ )

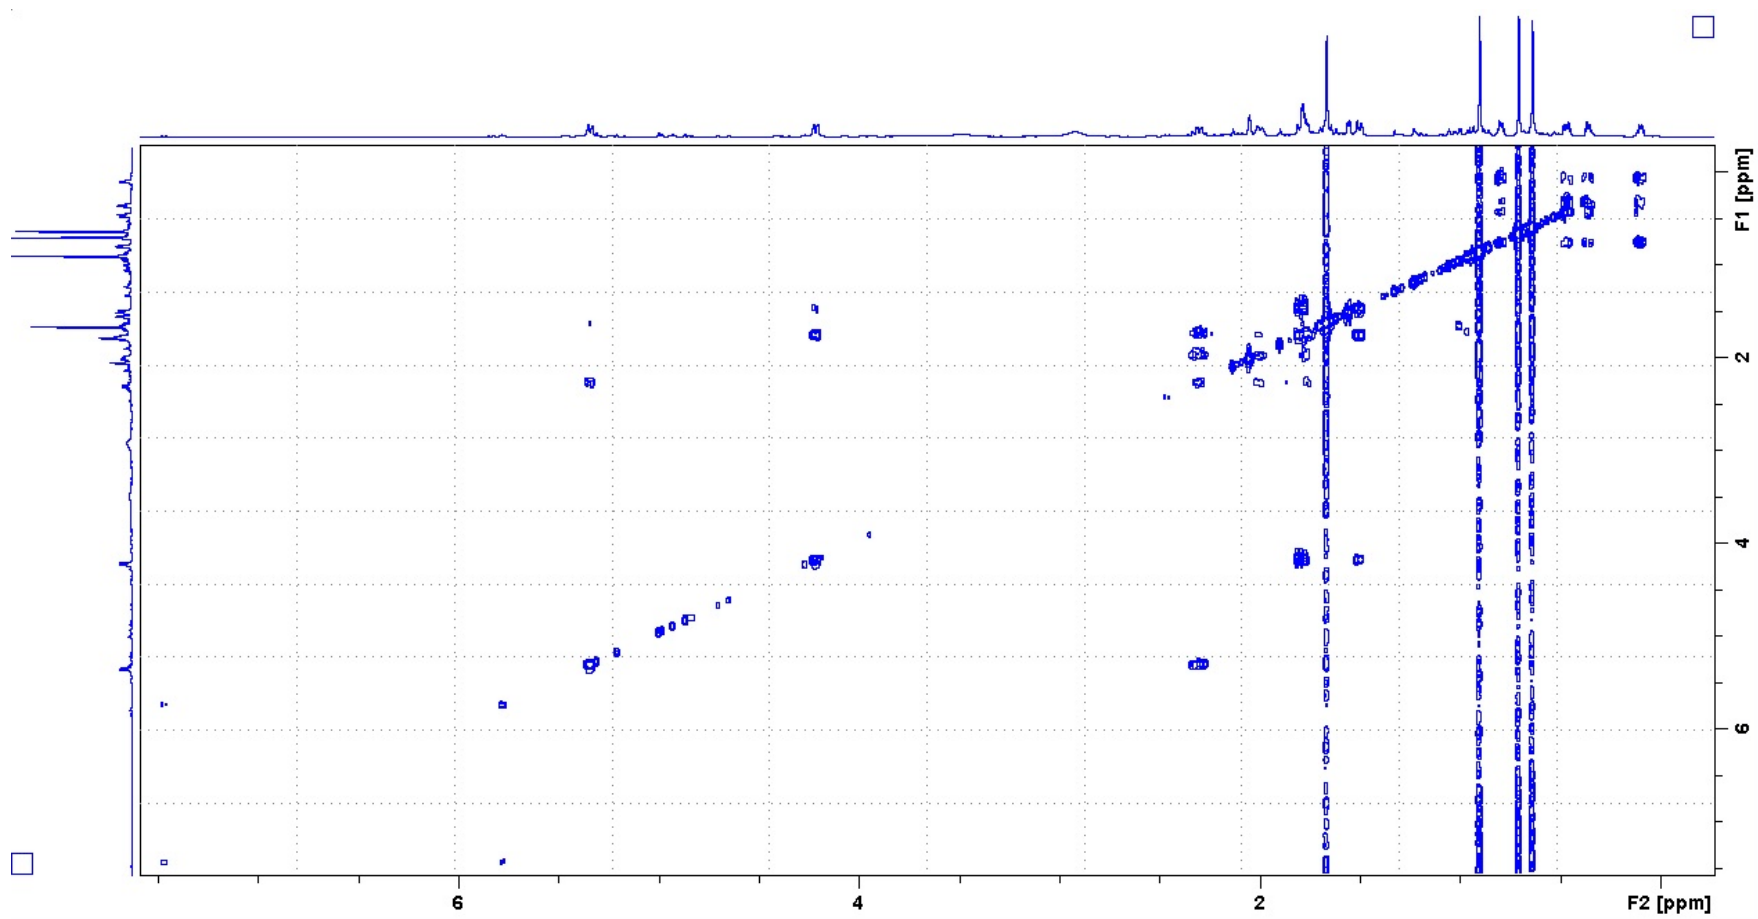

**Figure S6.** COSY Spectrum of Hypocypin A (**1**, 600 MHz, Acetone-*d*<sub>6</sub>)



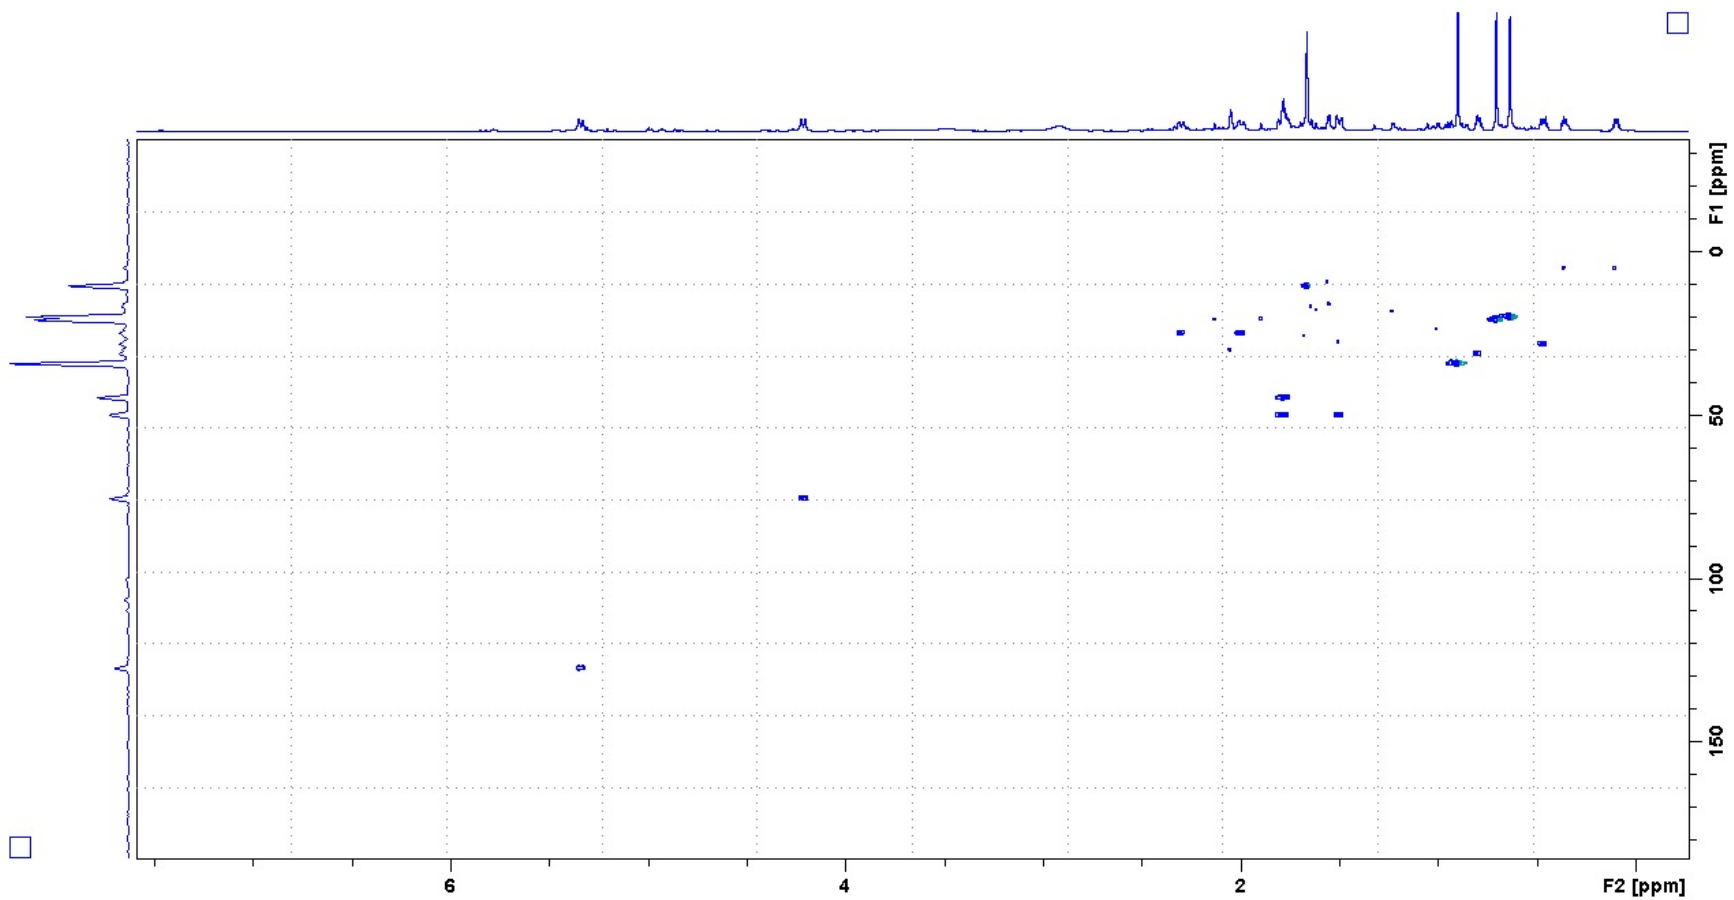

**Figure S7.** HSQC Spectrum of Hypocopin A (**1**, 600 MHz, Acetone- $d_6$ )

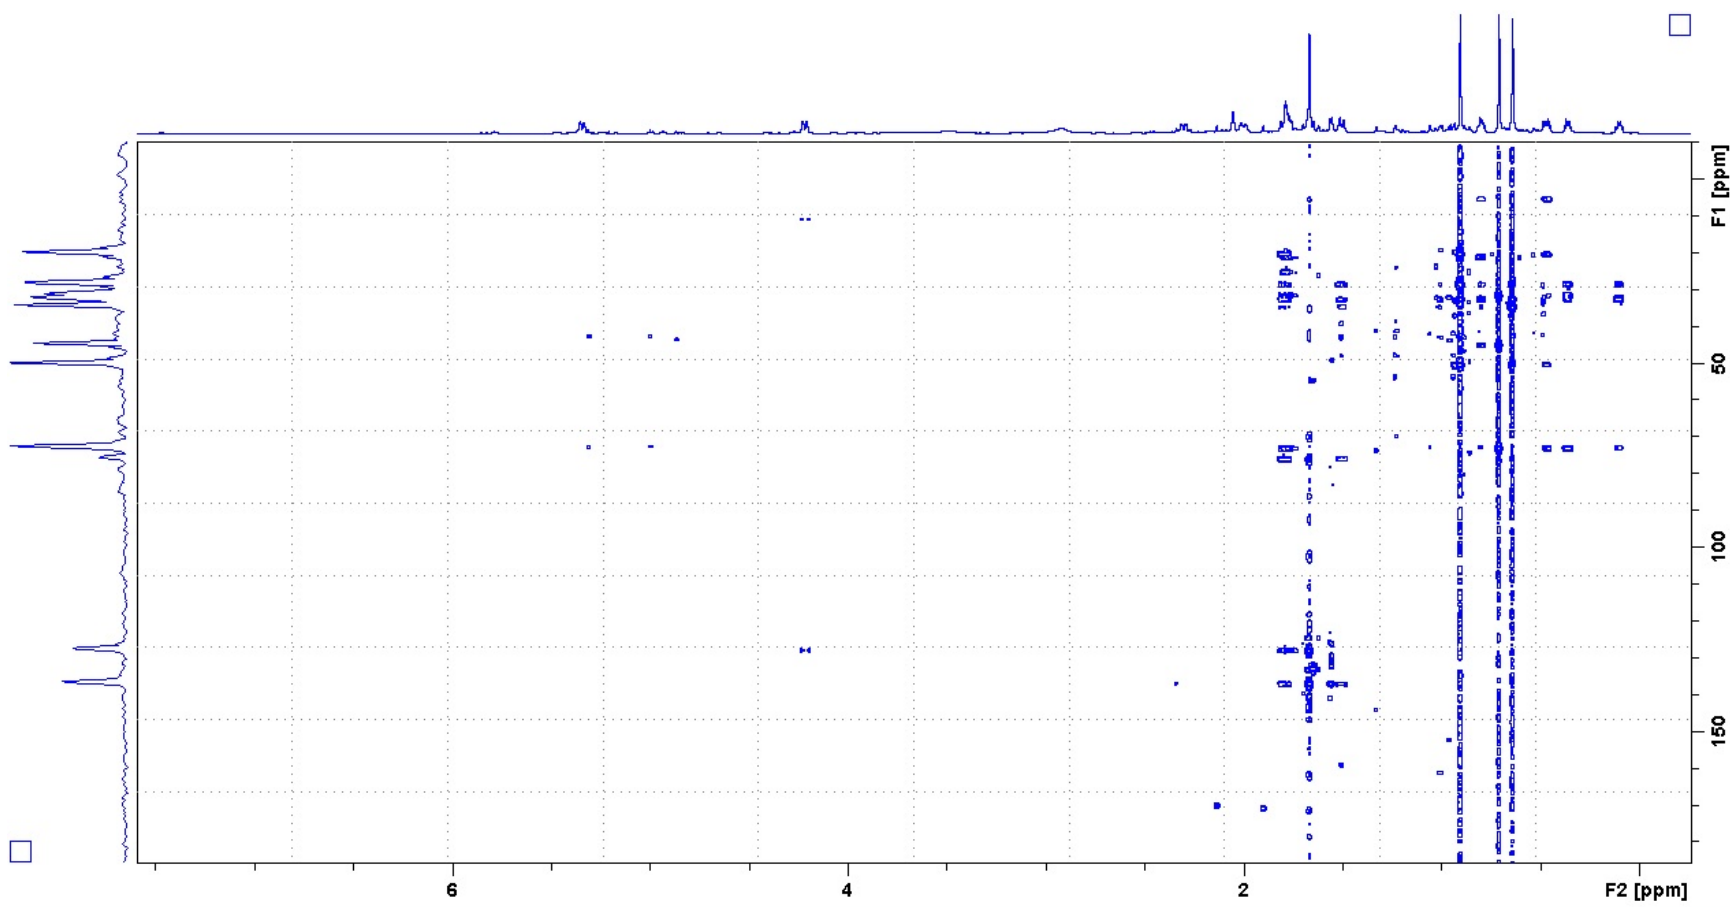

**Figure S8.** HMBC Spectrum of Hypocopin A (**1**, 600 MHz, Acetone- $d_6$ )

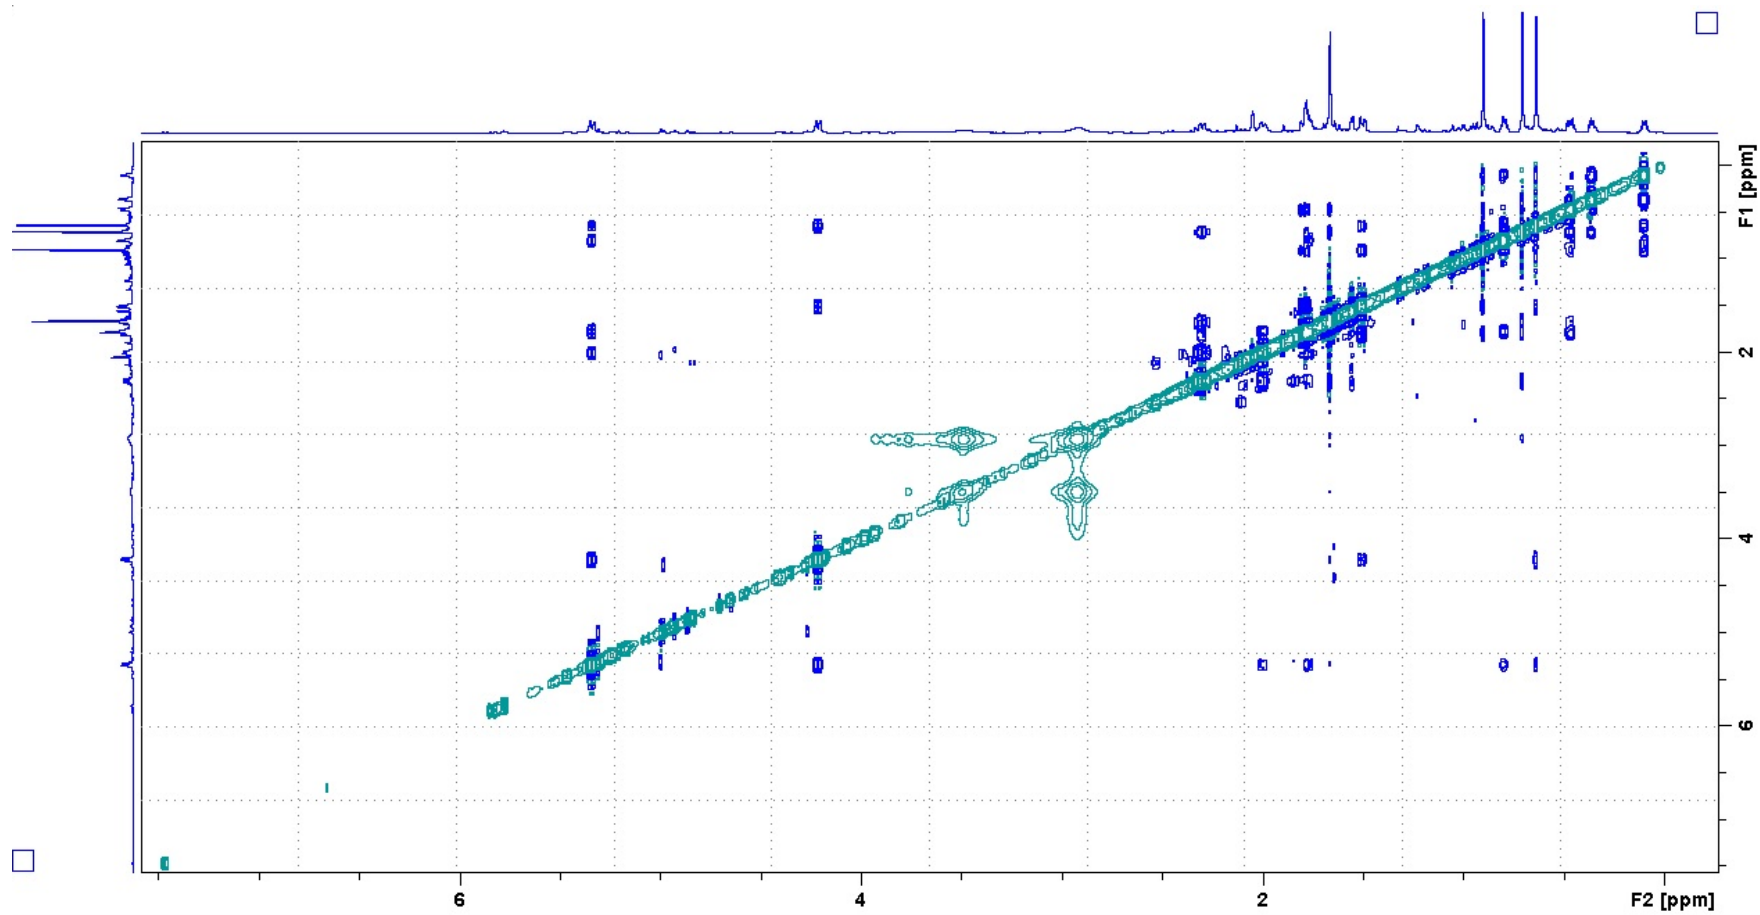

**Figure S9.** NOESY Spectrum of Hypocoprins A (1, 600 MHz, Acetone-*d*<sub>6</sub>)

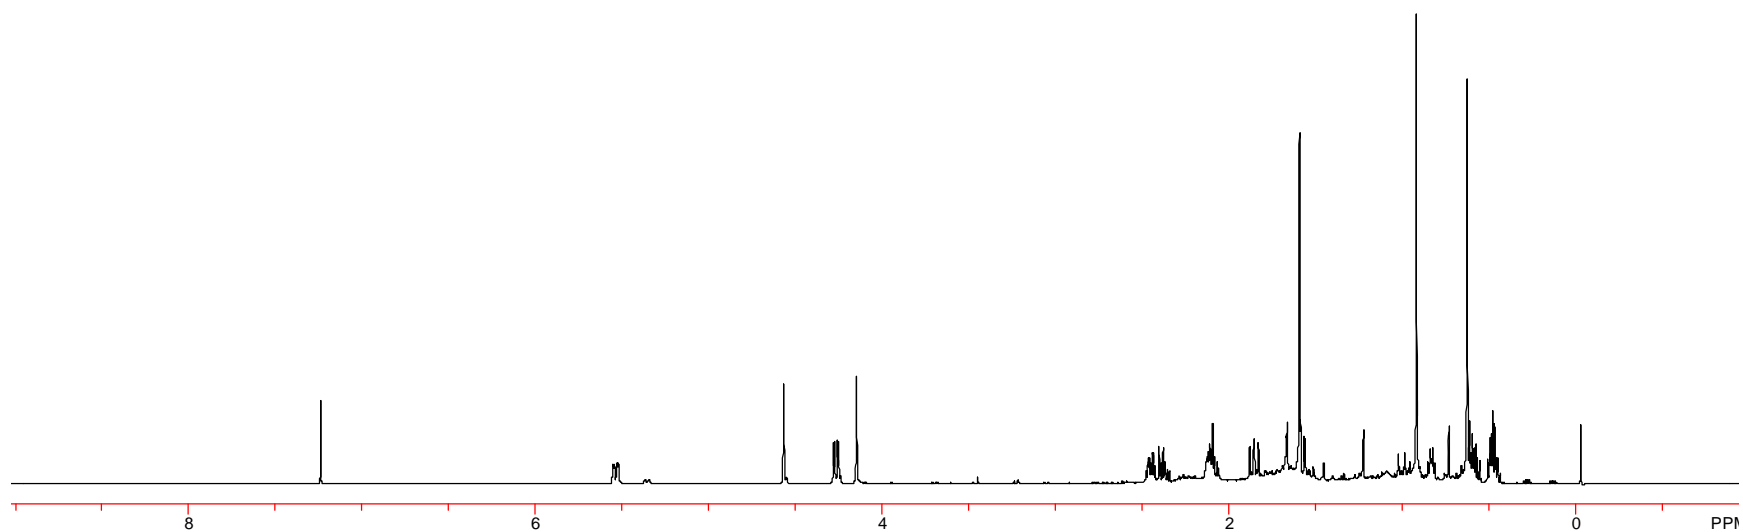

**Figure S10.** <sup>1</sup>H NMR Spectrum of Hypocoprin B (2, 500 MHz, CDCl<sub>3</sub>)

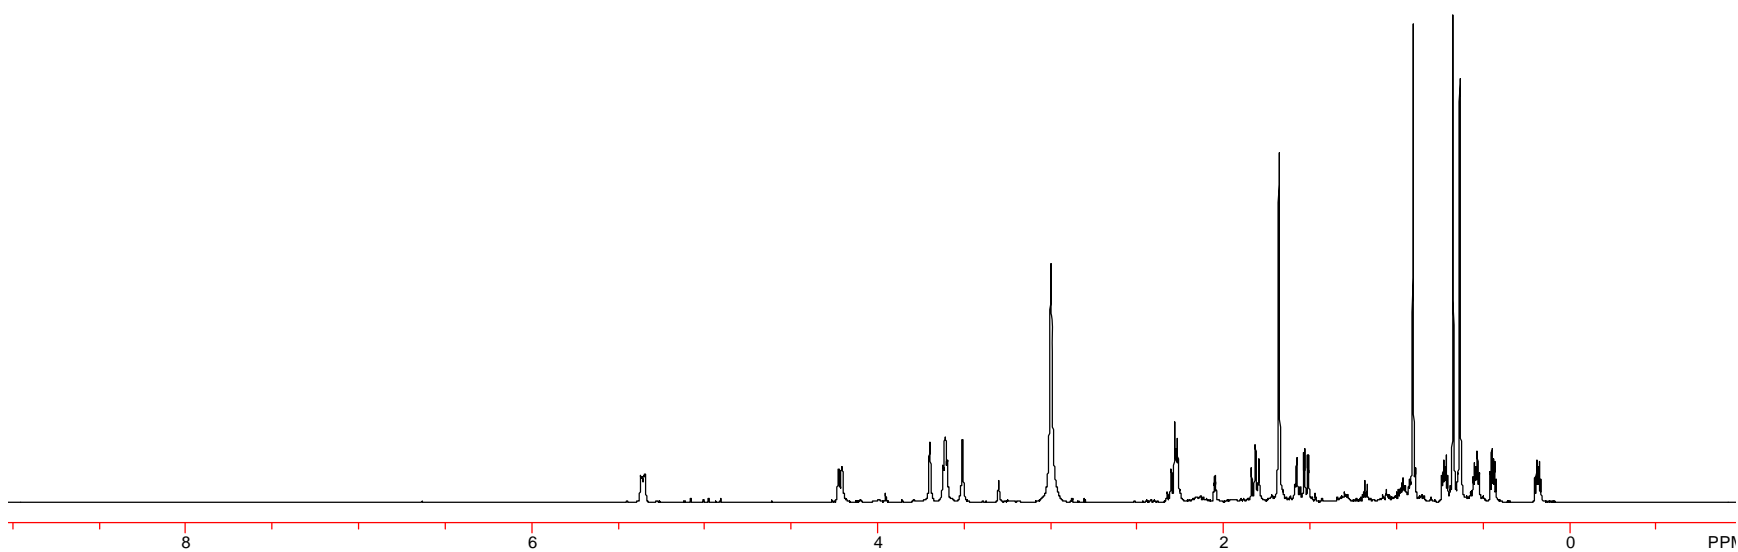

**Figure S11.**  $^1\text{H}$  NMR Spectrum of Hypocopin C (**3**, 400 MHz, Acetone- $d_6$ )



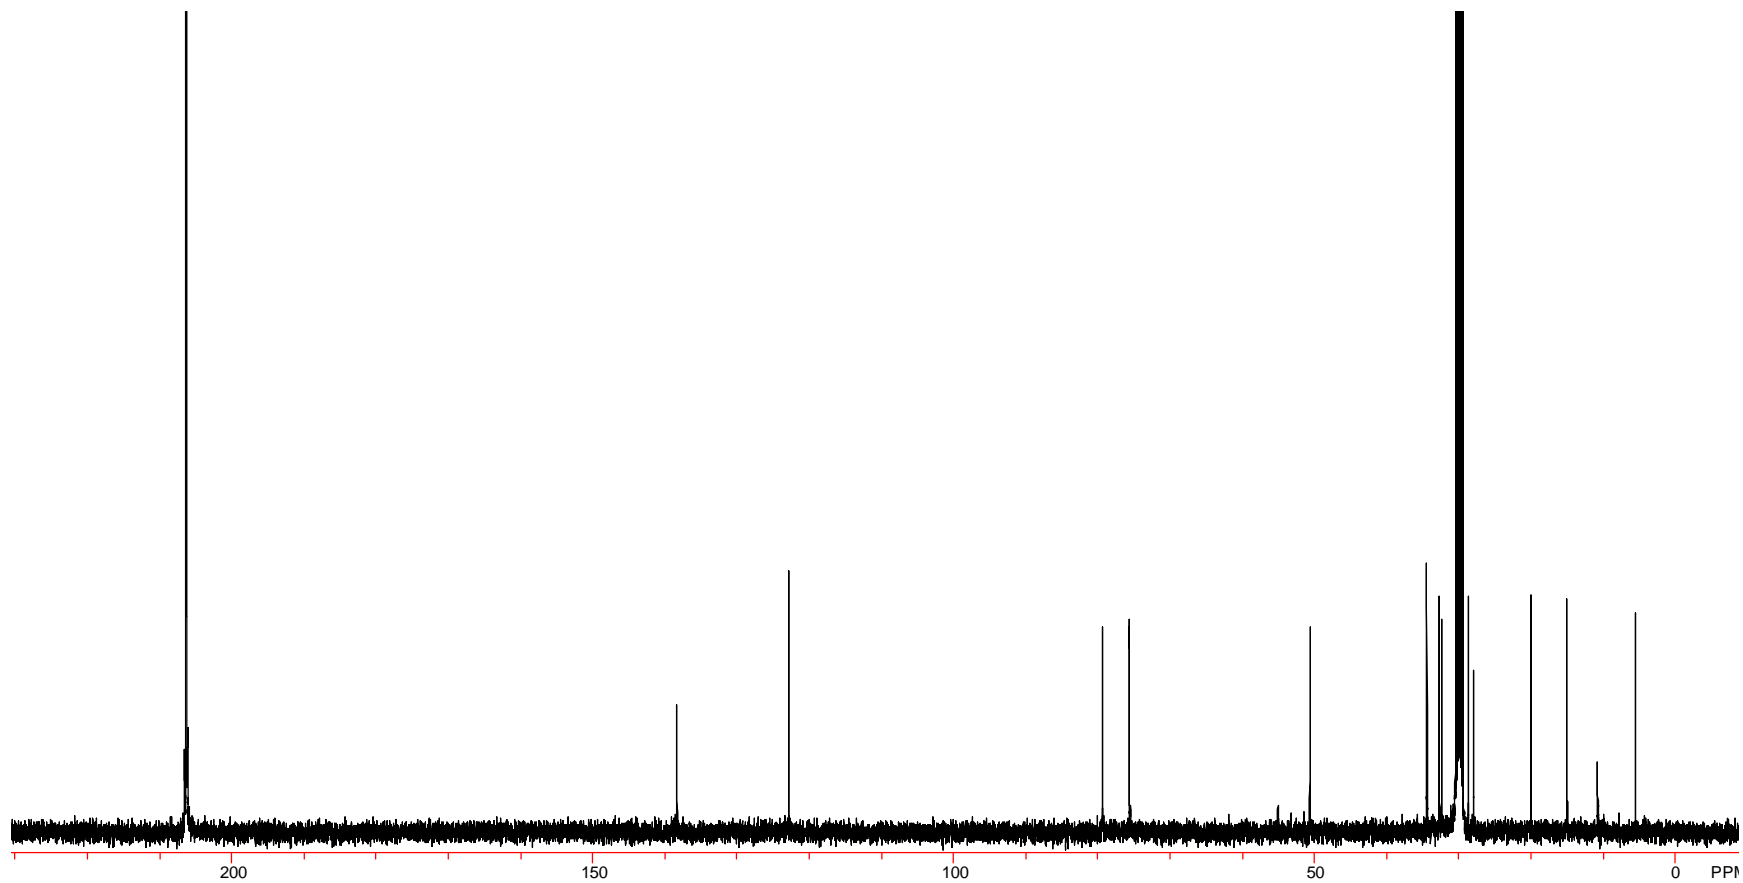

**Figure S12.**  $^{13}\text{C}$  NMR Spectrum of Hypocoprin C (**3**, 100 MHz,  $\text{Acetone-}d_6$ )

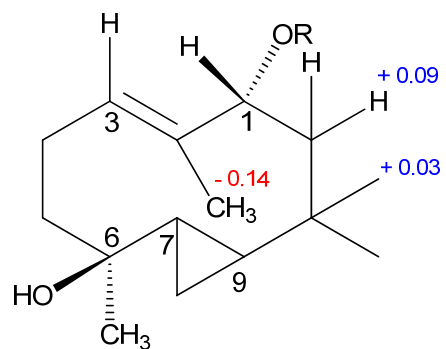

**Figure S13.** Observed chemical shift differences ( $\Delta\delta = \delta_S - \delta_R$ , ppm; 400 MHz) for the *R*- and *S*-MTPA esters of **1**. Only H's affording notable  $\Delta\delta$  values are labelled.
